# Supplementary material for: Ultrasmall zirconium carbide nanodots for synergistic photothermal-radiotherapy of glioma
Source: Royal Society of Chemistry journal article supplement (doi:10.1039/d2nr04239h), 2022-01-01
Supplement: d2nr04239h1.pdf [file d2nr04239h1.pdf]

## Supporting information

### Ultrasmall zirconium carbide nanodots for synergistic photothermal- radiotherapy of glioma

Mengyuan Yin<sup>1,2#</sup>, Xiangcun Chen<sup>3#</sup>, Qinglong Guo<sup>1,2#</sup>, Liang Xiao<sup>2,3</sup>, Peng Gao<sup>1</sup>, Dandan Zang<sup>4</sup>, Jun Dong<sup>5</sup>, Zhengbao Zha<sup>6</sup>, Xingliang Dai<sup>1\*</sup>, Xianwen Wang<sup>2\*</sup>

1. Department of Neurosurgery, the First Affiliated Hospital of Anhui Medical University, Hefei 230032, P. R. China

2. School of Biomedical Engineering, Research and Engineering Center of Biomedical Materials, Anhui Medical University, Hefei 230032, P. R. China

3. Department of Radiotherapy, the First Affiliated Hospital of Anhui Medical University, Hefei 230032, P. R. China

4. The Center for Scientific Research of Anhui Medical University, Hefei 230032, P. R. China

5. Department of Neurosurgery, the Second Affiliated Hospital of Soochow University, Suzhou, 215004, P. R. China

6. School of Food and Biological Engineering, Hefei University of Technology, Hefei, 230009, P. R. China.

#### Corresponding Author:

**E-mail:** [xianwenwang@ahmu.edu.cn](mailto:xianwenwang@ahmu.edu.cn) (X Wang); [daixingliang@ahmu.edu.cn](mailto:daixingliang@ahmu.edu.cn) (X Dai)

# These authors contributed equally to this work.

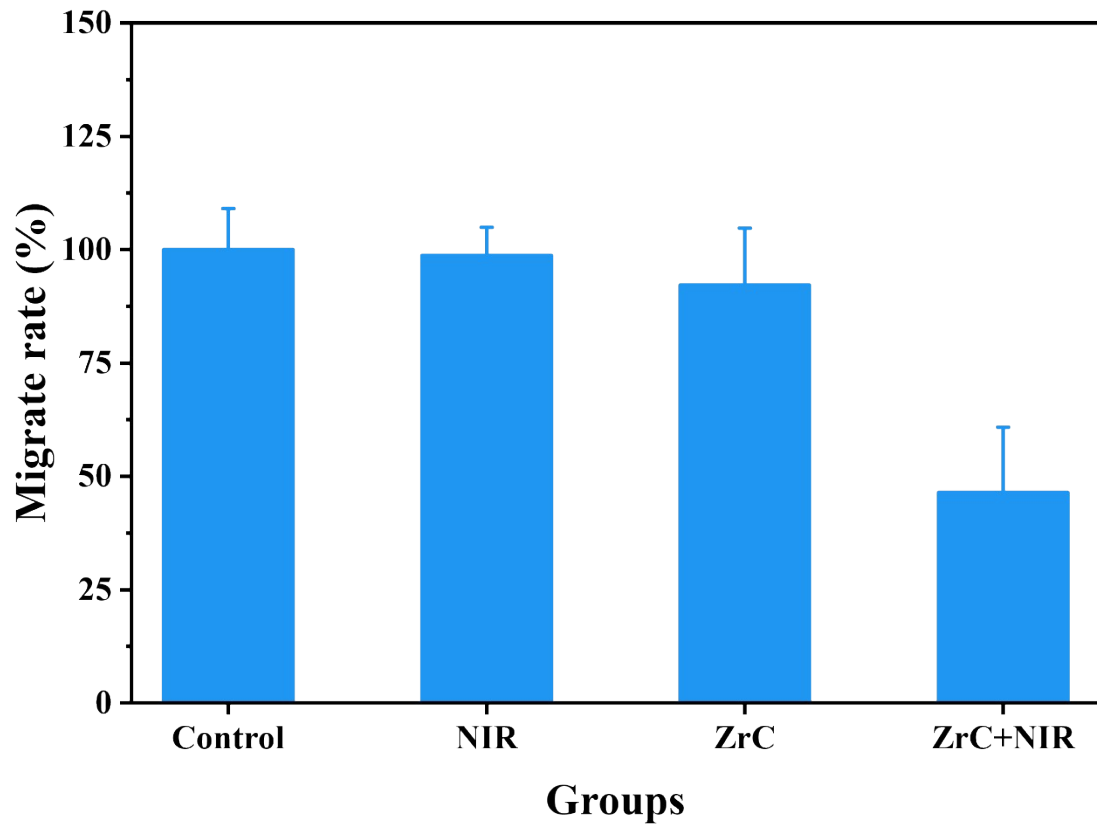

**Figure S1.** Migration rate of the scratch test.

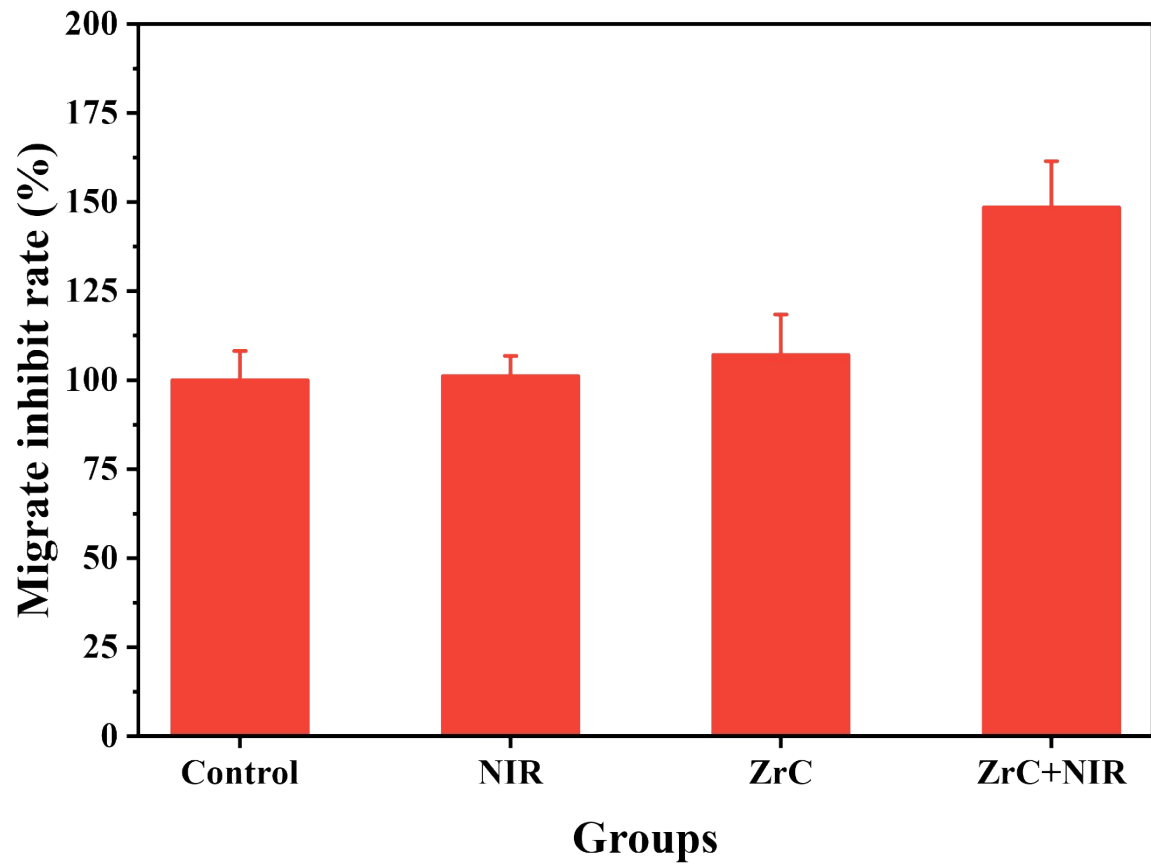

**Figure S2.** Migration inhibition rate of the scratch test.

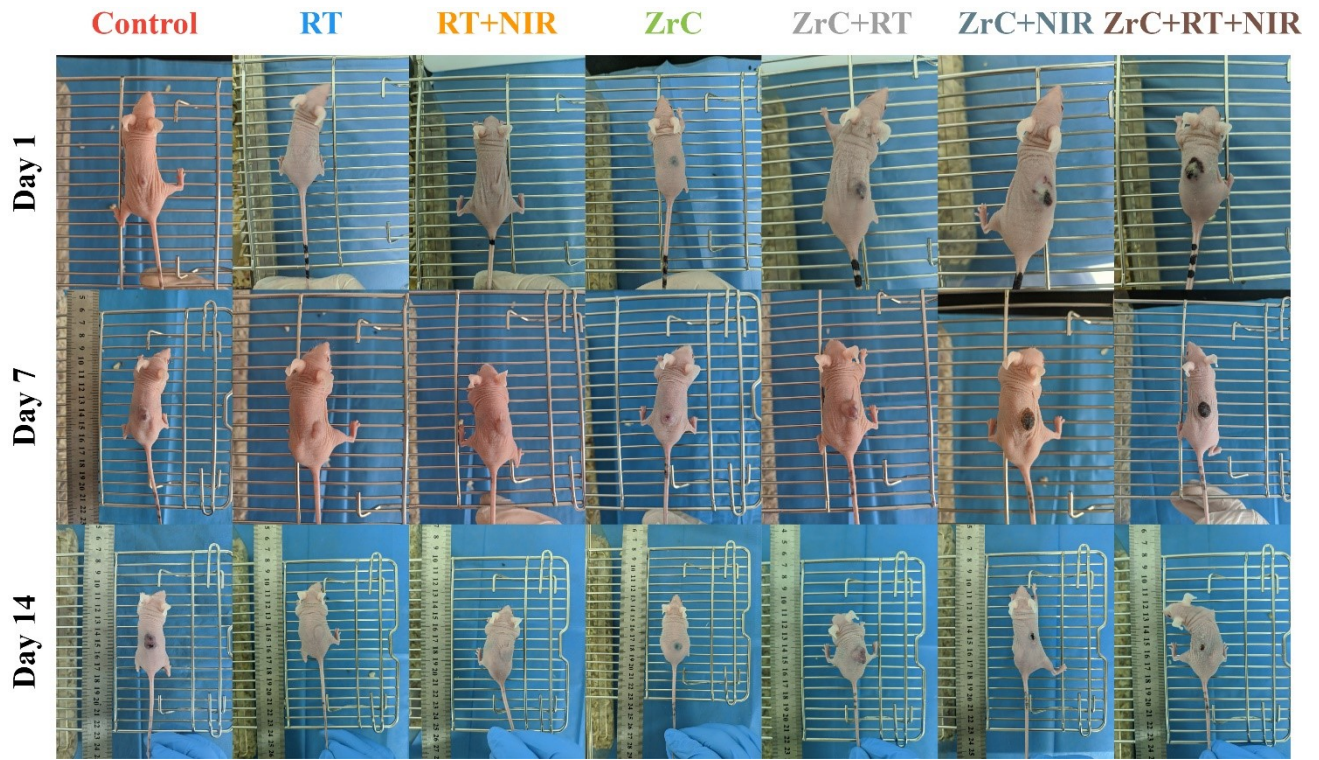

Figure S3. Digital photographs of glioma-bearing mice from different treatment groups.
